# Supplementary material for: Distribution and behaviour of trace metals in the Scheldt estuary in the period 1991-1994
Source: Royal Society of Chemistry journal article supplement (doi:10.1039/d2ra01722a), 1996-01-01
Supplement: d2ra01722a1.pdf [file d2ra01722a1.pdf]

## Supporting Information

# **A designed miniature sensor for the trace level detection and degradation studies of a toxic dye Rhodamine B**

Mazhar Hayat<sup>a</sup>, Afzal Shah<sup>a,\*</sup>, Muhammad Kamran Hakeem<sup>a</sup>, Muhammad Irfan<sup>a</sup>, Abdul Haleem<sup>a,\*</sup>, Sher Bahadar Khan<sup>b</sup>, and Iltaf Shah<sup>c</sup>

<sup>a</sup>Department of Chemistry, Quaid-i-Azam University, Islamabad 45320, Pakistan

<sup>b</sup>Department of Chemistry, King Abdulaziz University, P.O. Box 80203, Jeddah 21589, Saudi Arabia

<sup>c</sup>Department of Chemistry, College of Science, United Arab Emirates University, Al Ain P.O. Box 15551, United Arab Emirates

\*The correspondent authors: Afzal Shah & Abdul Haleem

E-mail: [afzals\\_qau@yahoo.com](mailto:afzals_qau@yahoo.com) & [haleem0300@gmail.com](mailto:haleem0300@gmail.com)

**Table S1.** Calculated surface areas of working electrodes

| <b>Working Electrode</b>                  | <b>Surface Area (cm<sup>2</sup>)</b> |
|-------------------------------------------|--------------------------------------|
| Bare GCE                                  | 0.02                                 |
| MWCNTs/GCE                                | 0.05                                 |
| NH <sub>2</sub> -fMWCNTs/GCE              | 0.09                                 |
| HOOC-fMWCNTs/NH <sub>2</sub> -fMWCNTs/GCE | 0.11                                 |

**Table S2.** Parameters obtained from EIS

| <b>Working Electrode</b>                  | <b>R<sub>e</sub> (Ohm)</b> | <b>R<sub>ct</sub> (Ohm)</b> | <b>CPE (μF)</b> |
|-------------------------------------------|----------------------------|-----------------------------|-----------------|
| Bare GCE                                  | 169.08                     | 5493.7                      | 67.7            |
| MWCNTs/GCE                                | 166.35                     | 3070.5                      | 43.6            |
| NH <sub>2</sub> -fMWCNTs/GCE              | 172.9                      | 178                         | 3.6             |
| HOOC-fMWCNTs/NH <sub>2</sub> -fMWCNTs/GCE | 154.4                      | 159                         | 2.9             |

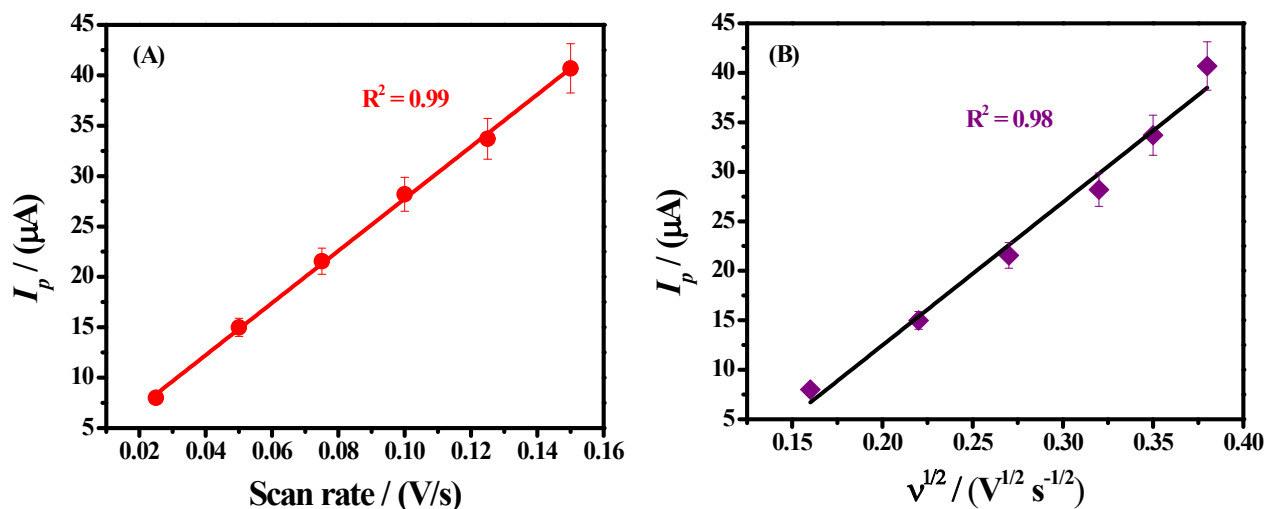

**Figure S1.** (A) plot of oxidation peak current vs. scan rate. (B) plot of oxidation peak current vs. square root of scan rate by using HOOC-*f*MWCNTs/NH<sub>2</sub>-*f*MWCNTs/GCE as a designed sensor in 0.1 M phosphate buffer.

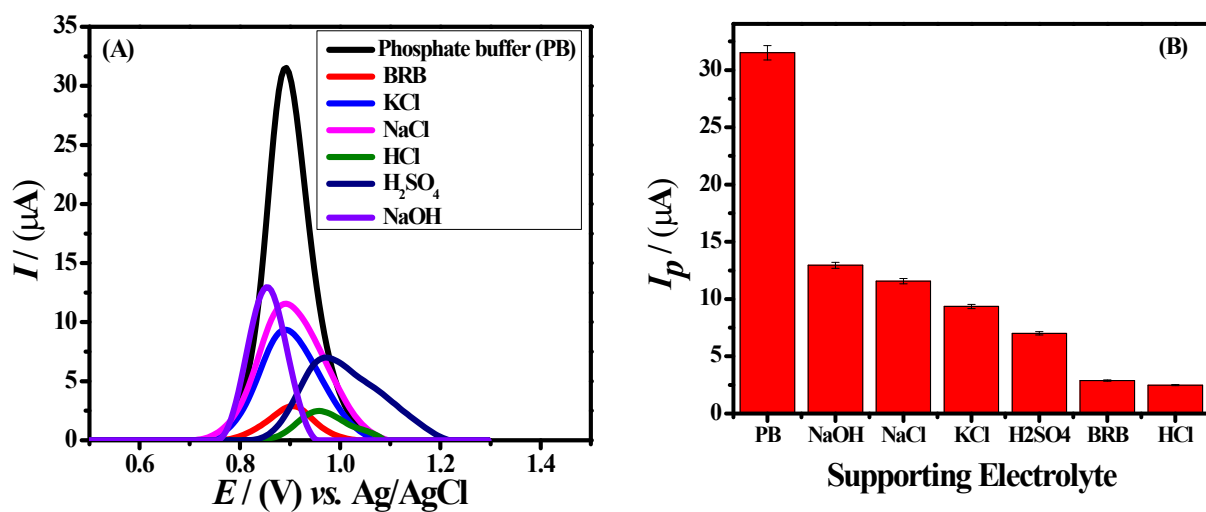

**Figure S2.** (A) SWVs recorded for 20  $\mu\text{M}$  RhB in different supporting media using HOOC-*f*MWCNTs/NH<sub>2</sub>-*f*MWCNTs/GCE as a modified working electrode. (B) The bar chart of peak current of 20  $\mu\text{M}$  of Rhodamine B vs. supporting electrolyte

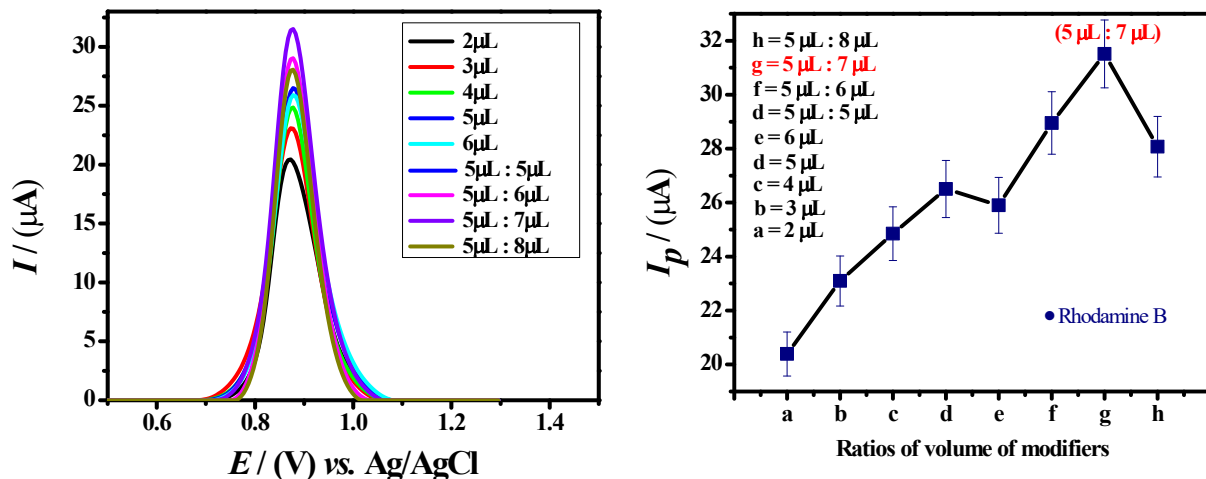

**Figure S3.** (A) The effect of different volume of modifiers on oxidation peak current of 20  $\mu\text{M}$  Rhodamine B. (B) Plot between peak current vs. ratios of volume of modifiers in 0.1 M phosphate buffer electrolyte.

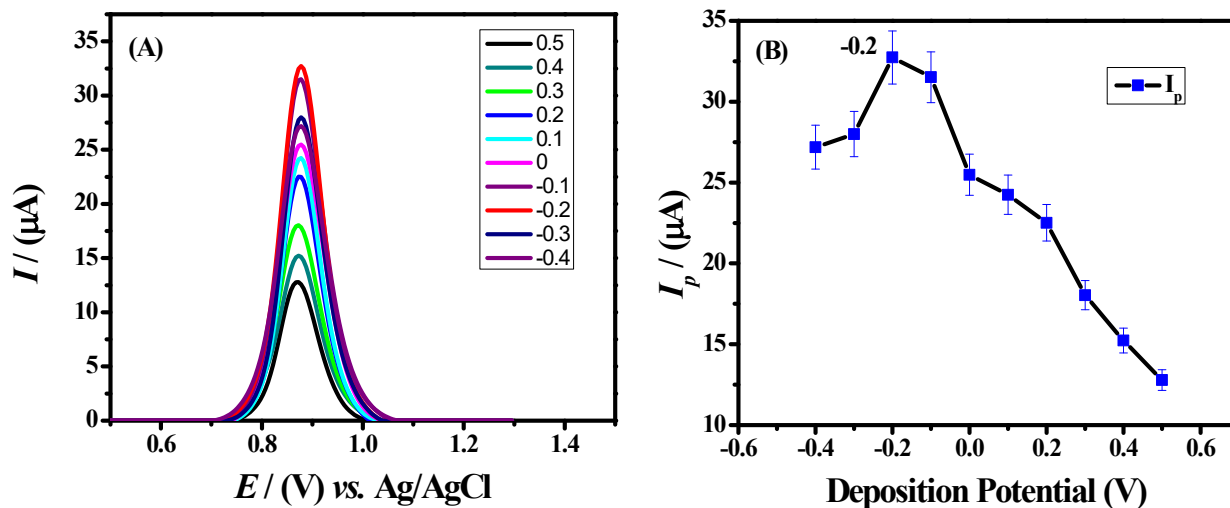

**Figure S4.** Selection of optimum deposition potential for the sensing of 20  $\mu\text{M}$  RhB. (A) Square wave voltammograms of 20  $\mu\text{M}$  RhB. (B) Plot of  $I_p$  versus accumulation potential using HOOC- $\beta$ -MWCNTs/ $\text{NH}_2$ - $\beta$ -MWCNTs/GCE in PBS of pH=7.0.

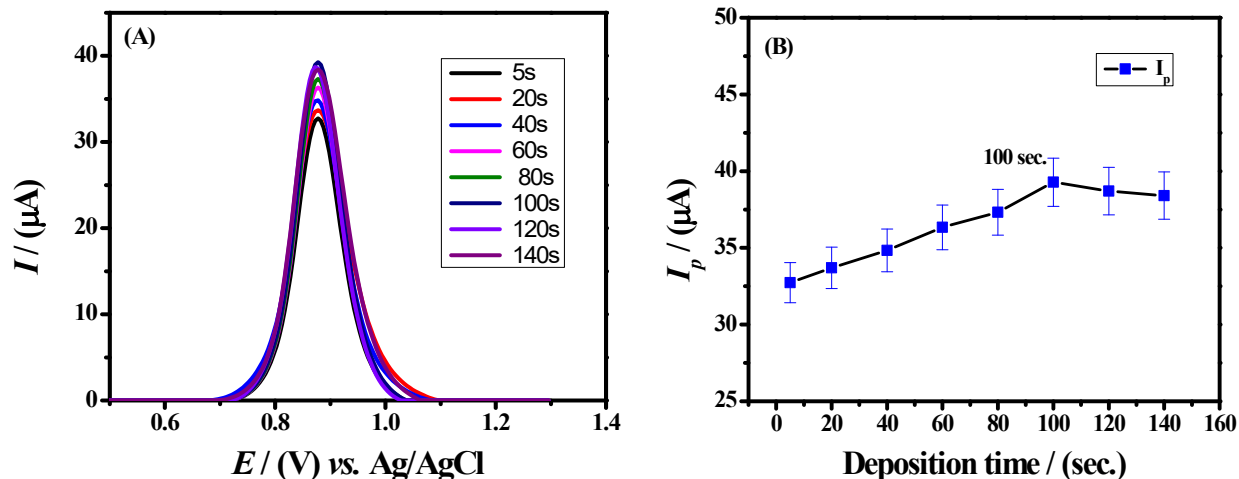

**Figure S5.** Selection of optimal accumulation time for sensing RhB using HOOC- $\beta$ -MWCNTs/ $\text{NH}_2$ - $\beta$ -MWCNTs/GCE in PBS at pH=7.0. **(A)** Square wave voltammograms of 20  $\mu\text{M}$  RhB. **(B)** Plot of  $I_p$  versus accumulation time.

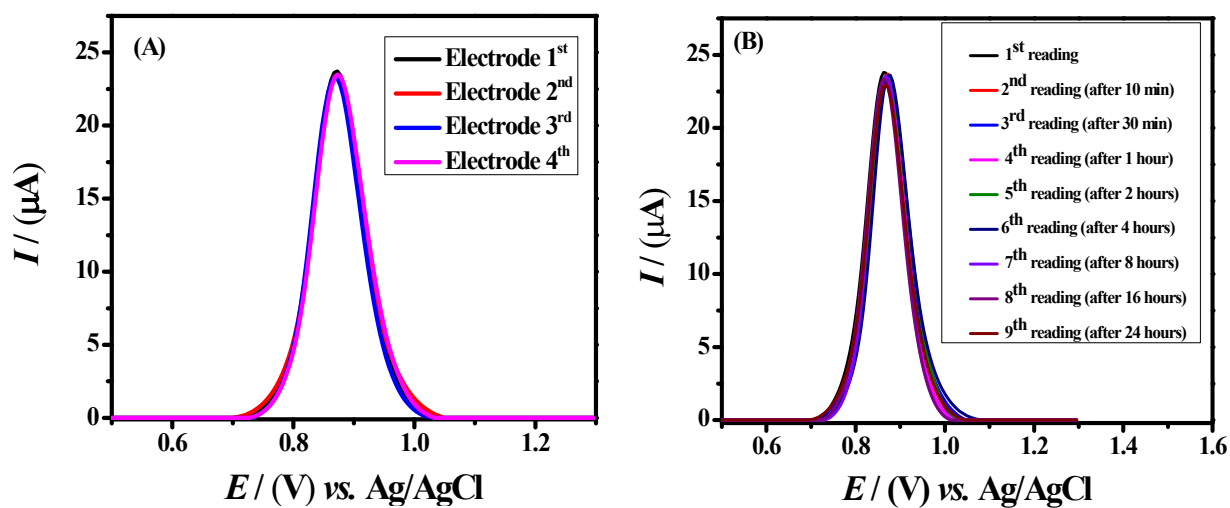

**Figure S6.** **(A)** SW voltammograms of 4  $\mu\text{M}$  RhB showing the reproducibility **(B)** Square wave voltammograms of 4  $\mu\text{M}$  RhB showing repeatability of the developed sensor in phosphate buffer of pH 7.0.

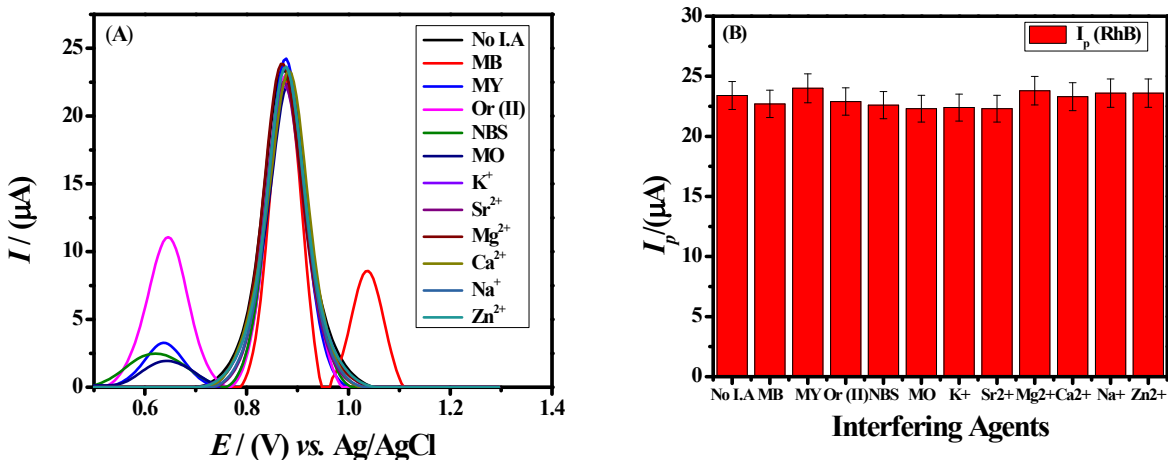

**Figure S7.** SWVs recorded on a surface of HOOC-fMWCNTs/NH<sub>2</sub>-fMWCNTs/GCE in 0.1 M phosphate buffer solution of pH 7.0 in the presence of RhB and interfering agents. **(B)** plotted bar chart between peak current of RhB and interfering agents.

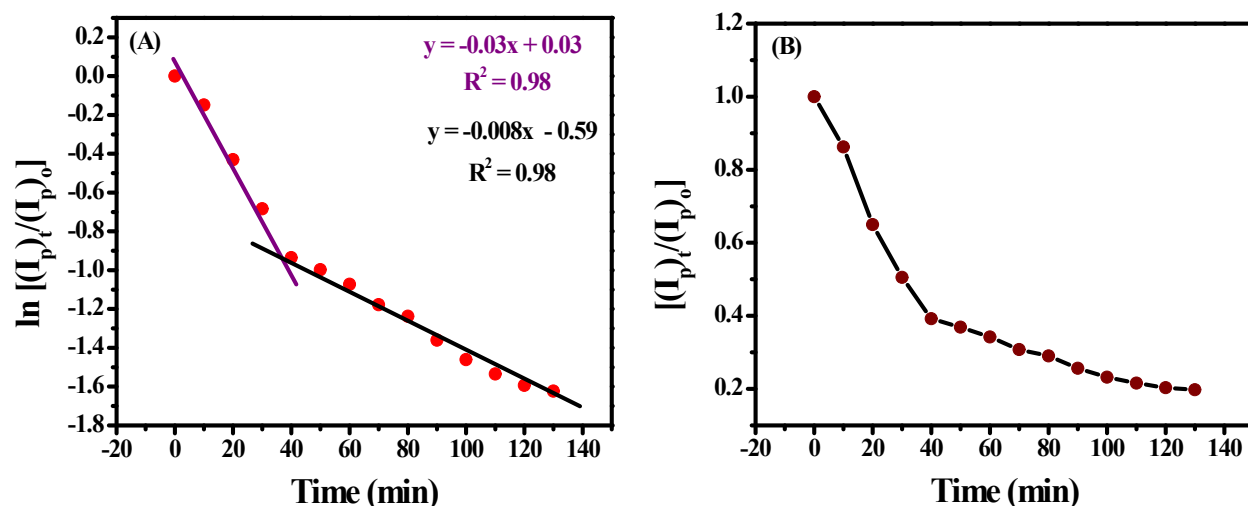

**Figure S8.** **(A)** Plot of  $\ln [(I_p)_t / (I_p)_0]$  versus time kinetic study using electrochemical data of the degradation of Rhodamine B. **(B)** Plot for the estimation of the extent of reduction of Rhodamine B vs. time.

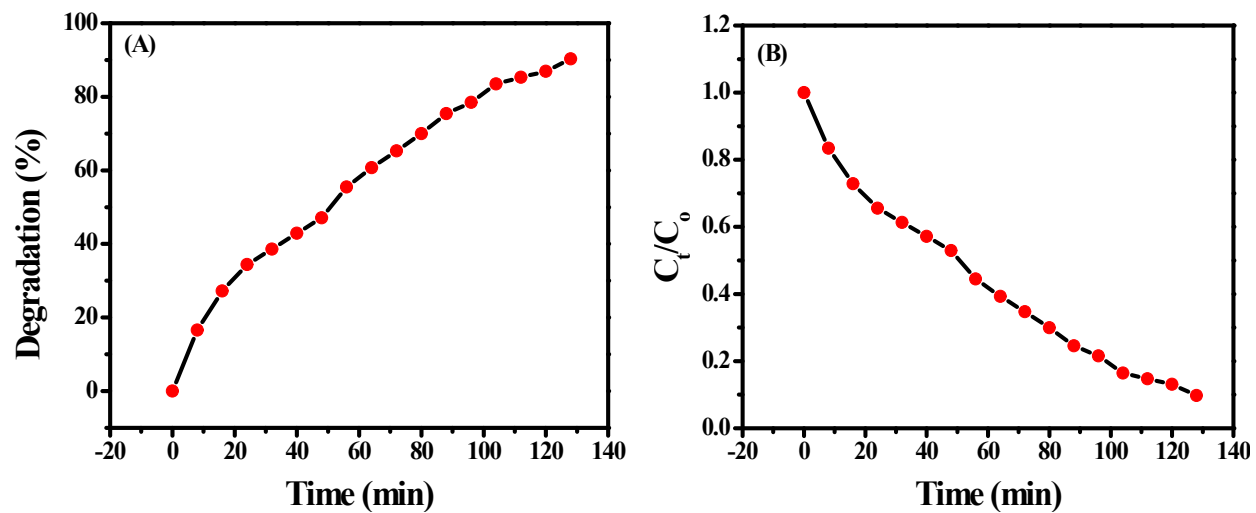

**Figure S9.** (A) Plot between % degradation and time. (B) Plot for the estimation of the extent of reduction of Rhodamine B vs. time.
